# Supplementary material
Source: PubMed Central journal article supplement (PMC11373755)
Supplement: sj-pdf-1-jfm-10.1177_1098612X19831203.pdf [file sj-pdf-1-jfm-10.1177_1098612X19831203.pdf]

Three-part series aiming to help veterinarians to develop greater understanding of feline behaviour, specifically problem behaviours, and more confidence in preventing and managing problem behaviours.

**Part 1: May 2018**

Understanding and recognising the roles of stressors, emotions and physical health in problem behaviour

## NORMAL FELINE BEHAVIOUR ... and why problem behaviours develop

**Author: John Bradshaw**

(2018) 20, 411–421

## BEHAVIORAL AWARENESS IN THE FELINE CONSULTATION Understanding physical and emotional health

**Authors: Debra F Horwitz and Ilona Rodan**

(2018) 20, 423–436

## UNDERSTANDING FELINE EMOTIONS ... and their role in problem behaviours

**Author: Sarah Heath**

(2018) 20, 437–444

## RECOGNISING AND ASSESSING FELINE EMOTIONS DURING THE CONSULTATION History, body language and behaviour

**Author: Sarah LH Ellis**

(2018) 20, 445–456

## TOOLS FOR MANAGING FELINE PROBLEM BEHAVIOURS

### **Environmental and behavioural modification**

**Author: Vicky Halls**

(2018) 20, 1005–1014

## TOOLS FOR MANAGING FELINE PROBLEM BEHAVIOURS

### **Owner understanding and involvement**

**Author: Vicky Halls**

(2018) 20, 1015–1023

## TOOLS FOR MANAGING FELINE PROBLEM BEHAVIORS

### **Pheromone therapy**

**Author: Kristyn R Vitale**

(2018) 20, 1024–1032

## TOOLS FOR MANAGING FELINE PROBLEM BEHAVIOURS

### **Psychoactive medications**

**Authors: Sagi Denenberg and Maya Bräm Dubé**

(2018) 20, 1034–1045

**Part 3: March 2019**

Discussing the most common differential diagnoses for problem behaviours and approaches to prevention and treatment

COMMON FELINE  
PROBLEM BEHAVIOURS  
**Unacceptable indoor elimination**

**Author: Sarah Heath**

(2019) **21**, 199–208

COMMON FELINE  
PROBLEM BEHAVIORS  
**Urine spraying**

**Author: Debra F Horwitz**

(2019) **21**, 209–219

COMMON FELINE  
PROBLEM BEHAVIORS  
**Aggression in multi-cat households**

**Author: Daniela Ramos**

(2019) **21**, 221–233

COMMON FELINE  
PROBLEM BEHAVIORS  
**Destructive scratching**

**Authors: Theresa DePorter and Ashley L Elzerman**

(2019) **21**, 235–243

COMMON FELINE  
PROBLEM BEHAVIOURS  
**Owner-directed aggression**

**Authors: Marta Amat and Xavier Manteca**

(2019) **21**, 245–255
